# Supplementary material
Source: PubMed Central journal article supplement (PMC4018890)
Supplement: CVI.00003-14_zcd999094962so1.pdf [file CVI.00003-14_zcd999094962so1.pdf]

## SUPPLEMENTARY FIGURE LEGENDS

**Figure S1. Analysis of c-PB10.** (A) Coomassie blue stained non-reduced SDS PAGE of cPB10 (lanes 4-7) as compared to a Mark 12 standard (lane 1) and Rituximab (lane 2). Lane 4 was loaded with 0.75 ug of protein and lanes 5-7 loaded in triplicate with 1.5 ug of protein. Data indicate cPB10 was successfully purified from *N. benthamiana* as an intact antibody with comparable purity to commercially derived Rituximab. Data was captured using a NuPAGE® Novex® 4-12% Bis-Tris gel. (B) HPLC Size Exclusion analysis of final cPB10 drug product. Data indicate that cPB10 was purified to 100% monomeric IgG. Data was captured using a TSKgel G3000SW from Tosoh Bioscience.

**Figure S2. Subunit specificity of chimeric mAbs.** Nunc Maxisorb F96 microtiter plates (ThermoFisher Scientific) were coated with ricin, RTA, RTB or BSA (each at 1 µg/ml) overnight and then probed with (A) c-SyH7 (B) c-PB10, (C) c-SyIH3 or (D) c-JB4. Horseradish peroxidase (HRP)-labeled goat anti-human IgG (Invitrogen) was used as the secondary reagent and the plates were developed using 3,3',5,5' tetramethylbenzidine (Kirkegaard & Perry Labs, Gaithersburg, MD). The plates were analyzed with a SpectroMax 250 spectrophotometer with Softmax Pro 5.4.5 software (Molecular Devices, Sunnyvale, CA).
