# Supplementary material
Source: PubMed Central journal article supplement (PMC4018890)

A

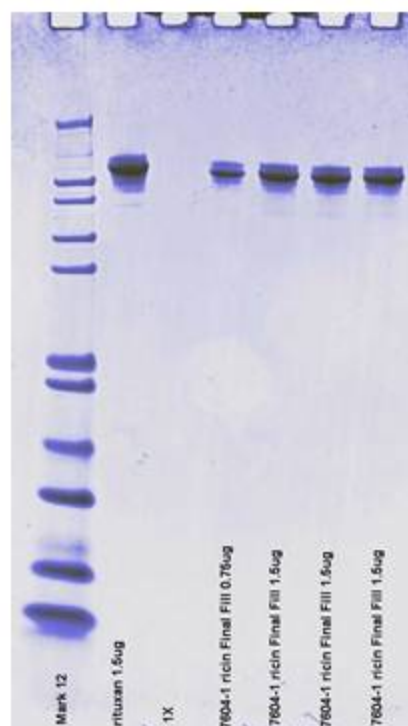

B

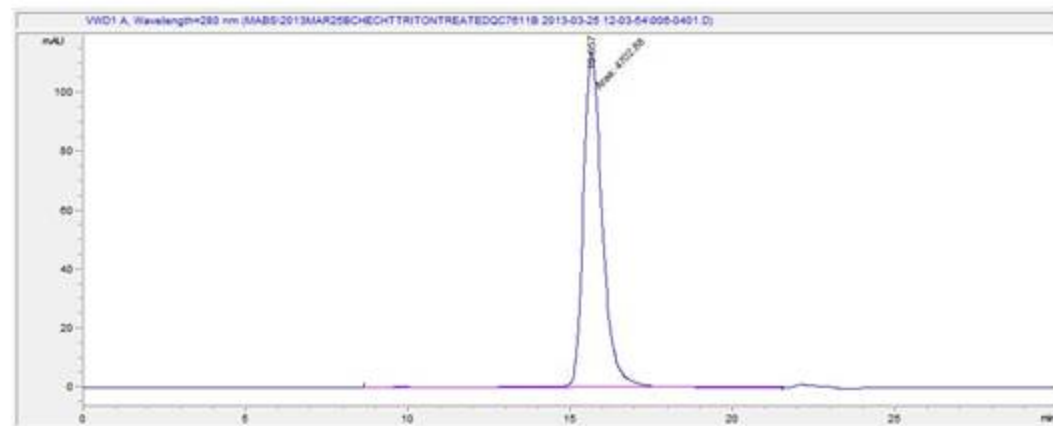

Supplement: CVI.00003-14_zcd999094962so2.pdf [file CVI.00003-14_zcd999094962so2.pdf]

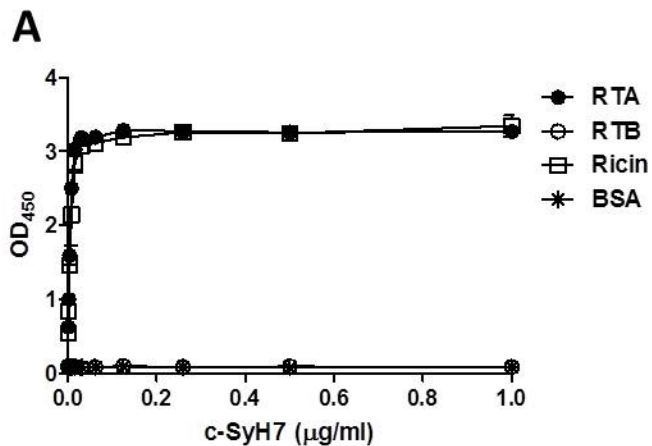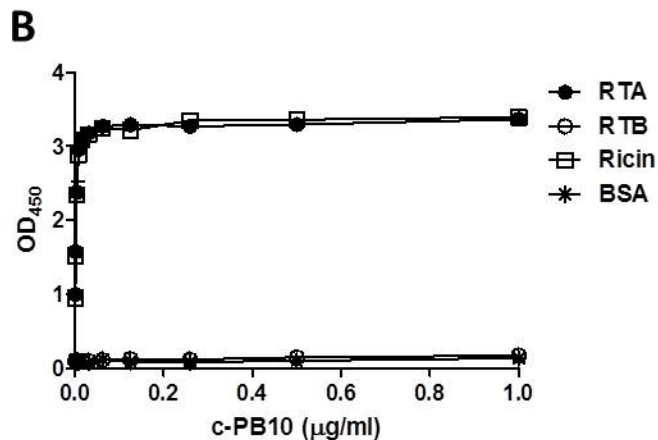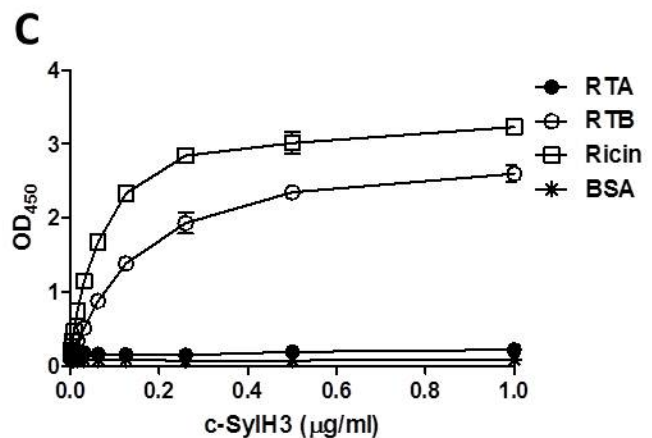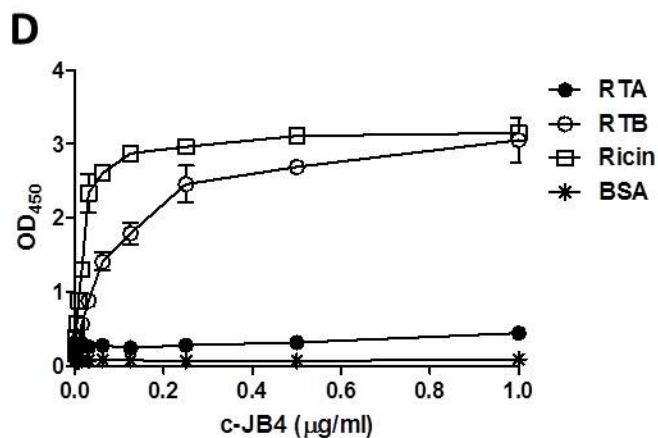

Supplement: CVI.00003-14_zcd999094962so3.pdf [file CVI.00003-14_zcd999094962so3.pdf]
